# Supplementary material for: De novo search for non-coding RNA genes in the AT-rich genome of Dictyostelium discoideum: Performance of Markov-dependent genome feature scoring
Source: HighWire-hosted journal article supplement (doi:10.1101/gr.069104.107), 2008-03-17
Supplement: Larsson_supplemental_data.pdf [file Larsson_supplemental_data.pdf]

**Supplemental Figure S1.** Bar graph showing the size distribution and contents of clusters. Red and yellow colors indicate novel predictions with or without an upstream DUSE sequence, respectively. Green and blue bars represent predictions overlapping known or confidently predicted ncRNA genes with or without upstream DUSE sequence, respectively. Hatched bars indicate a sequence residing on the D. discoideum chromosome two duplication. Known or experimentally verified ncRNAs belonging to a cluster are indicated above or below bars. A star above or below a bar indicates presence of tRNAs within that cluster.

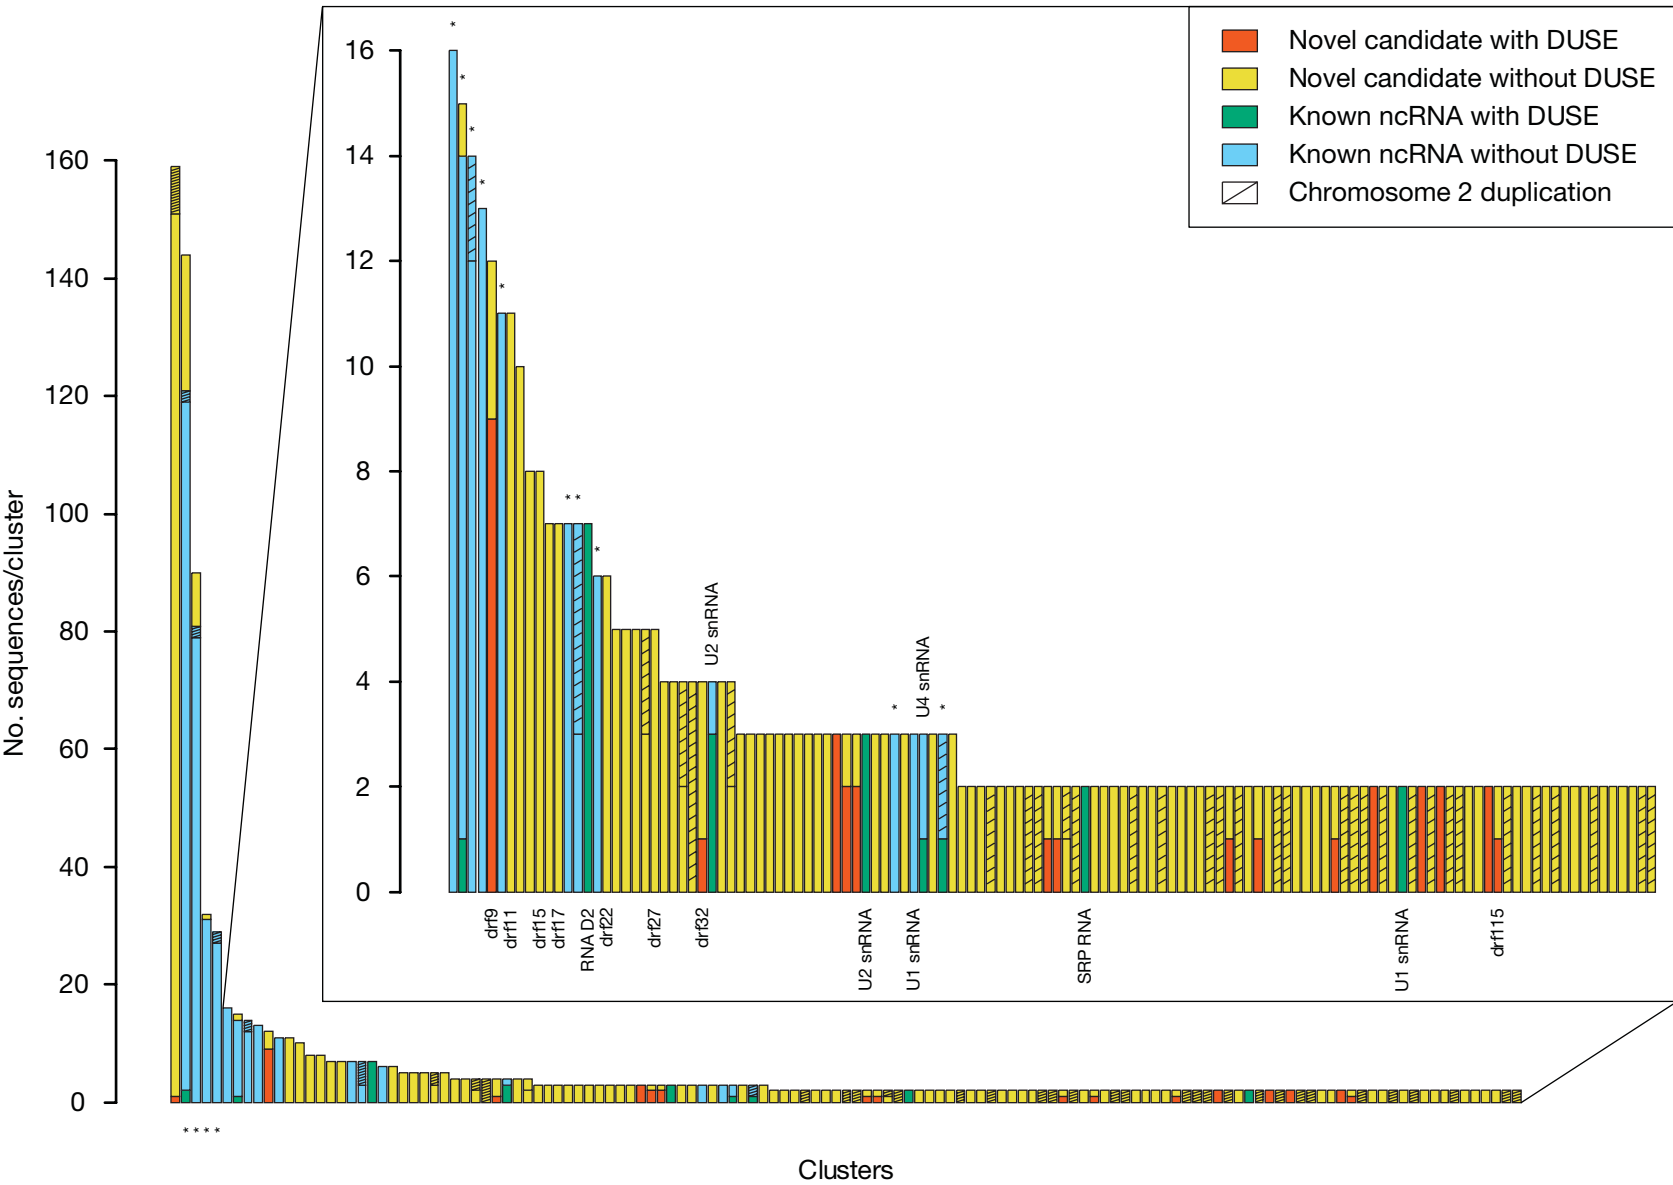

**Supplemental Figure S2.** Ranks of *M. jannaschii* M1 ncRNA predictions plotted against M0 ncRNA prediction. A solid black dot indicates a prediction. Gray diamonds indicates predictions that overlap known ORFs. Blue squares indicate predictions overlapping a known tRNA or rRNA gene. Red and yellow triangles represent predictions that overlap sequences reported in the works by Klein et al. and Schattner (Klein et al. 2002; Schattner 2002), respectively. Green circles represent SRP RNA and RNase P RNA. Identities of some predictions are indicated. The yellow and red dotted horizontal and vertical lines mark the ranks where all predictions from Schattner and Klein et al. are included. The blue dotted line indicates the ranks where all tRNA and rRNA genes are successfully predicted. A rank of -1 indicates that the region was not predicted by the corresponding model.

### *M. jannaschii* M1 vs M0 prediction ranks

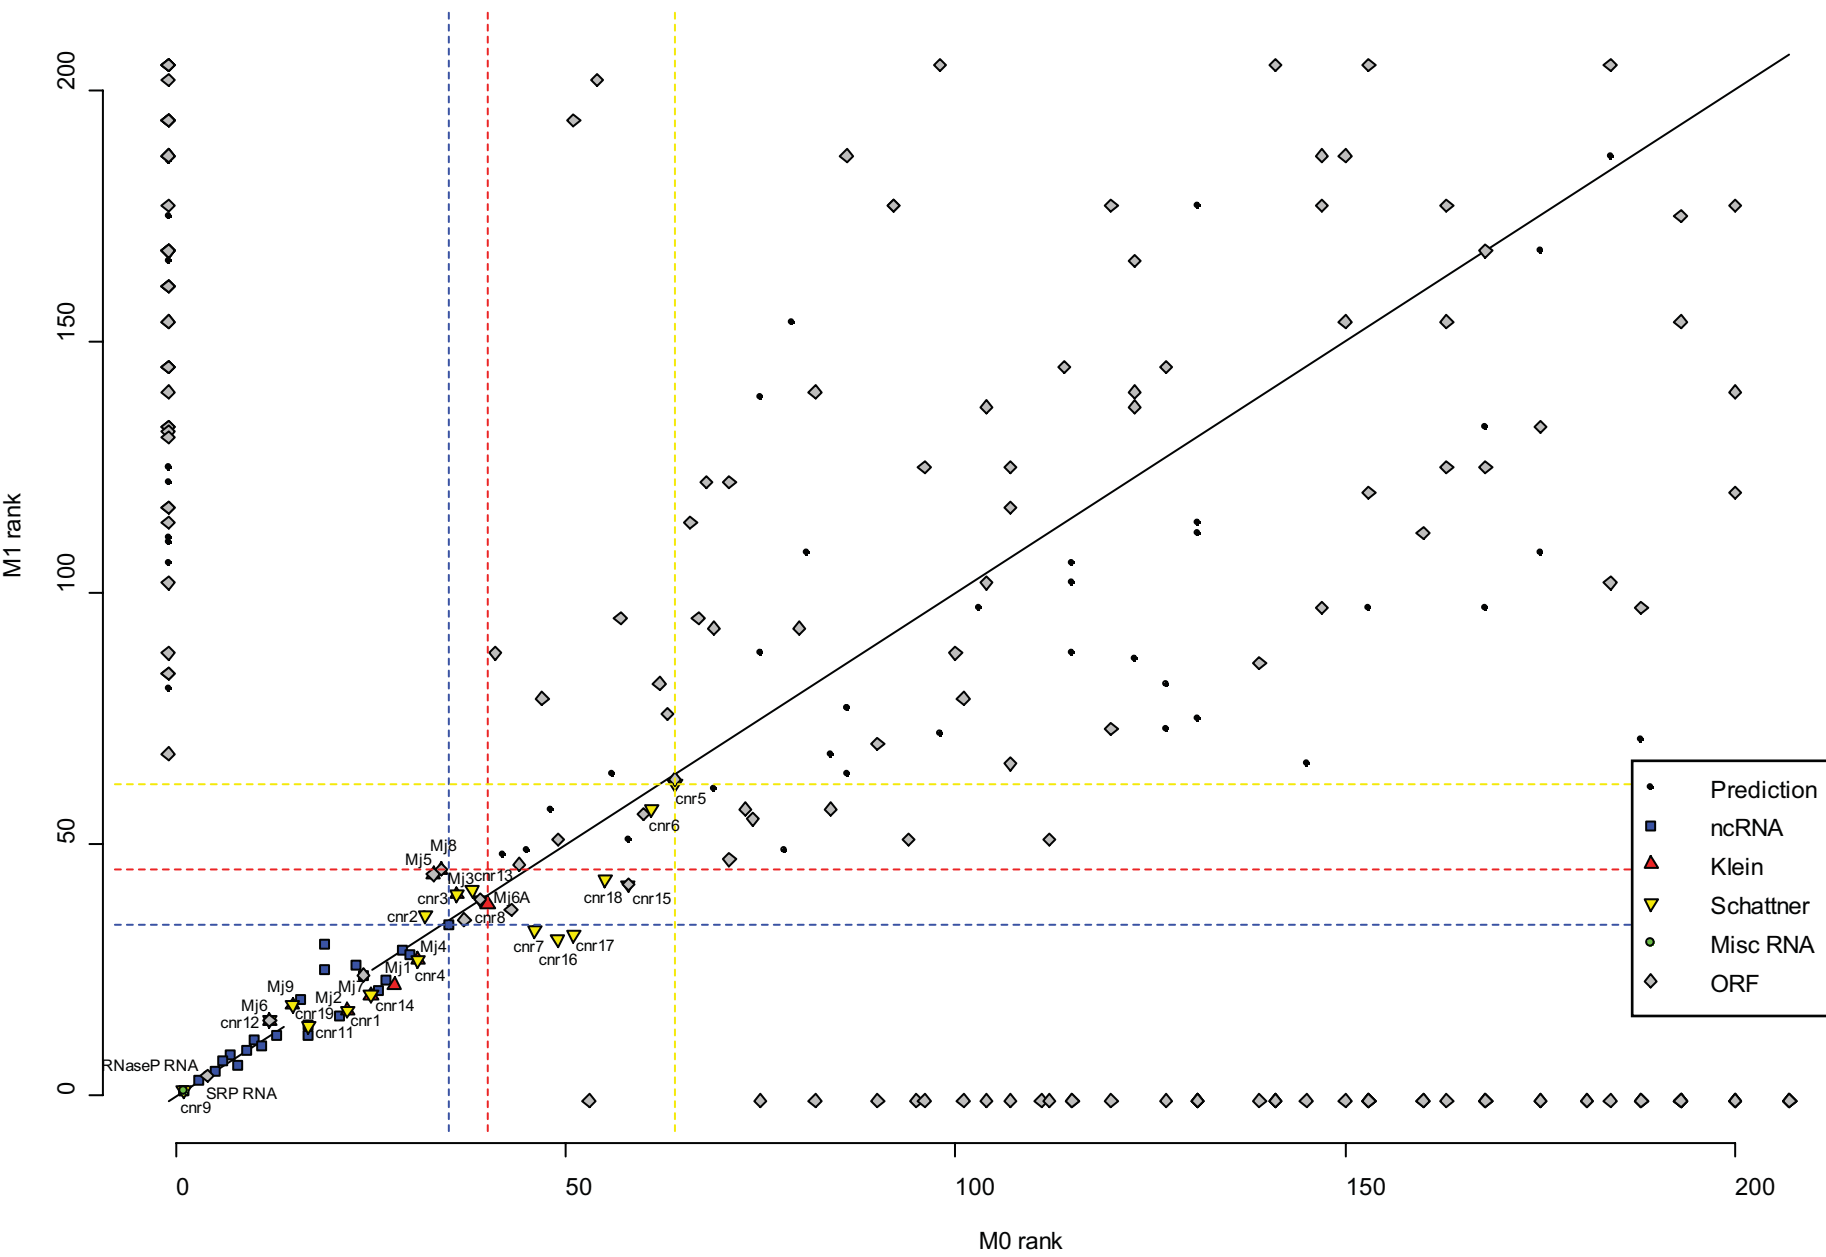

**Supplemental Figure S3.** Observed/expected dinucleotide ratio for ncRNA and background genome for *D. discoideum* (Dd), *G. lamblia* (Gl), *P. falciparum* (Pf), *D. melanogaster* (Dm) and *M. jannaschii* (Mj). Filled circles represent observed/expected dinucleotide ratios for ncRNA genes and filled squares for background genome. Mean and standard deviation is indicated. Background genomes were constructed by masking annotated ncRNAs and exons except for *M. jannaschii* where only ncRNAs were masked. Sequence data and annotations were downloaded from the Generic Model Organism Database (<http://gmod.mbl.edu>), PlasmoDB (<http://www.plasmodb.org>), FlyBase (<http://www.flybase.org>) for Gl, Pf and Dm, respectively. Data for Mj was obtained from GenBank (<http://www.ncbi.nlm.nih.gov>).

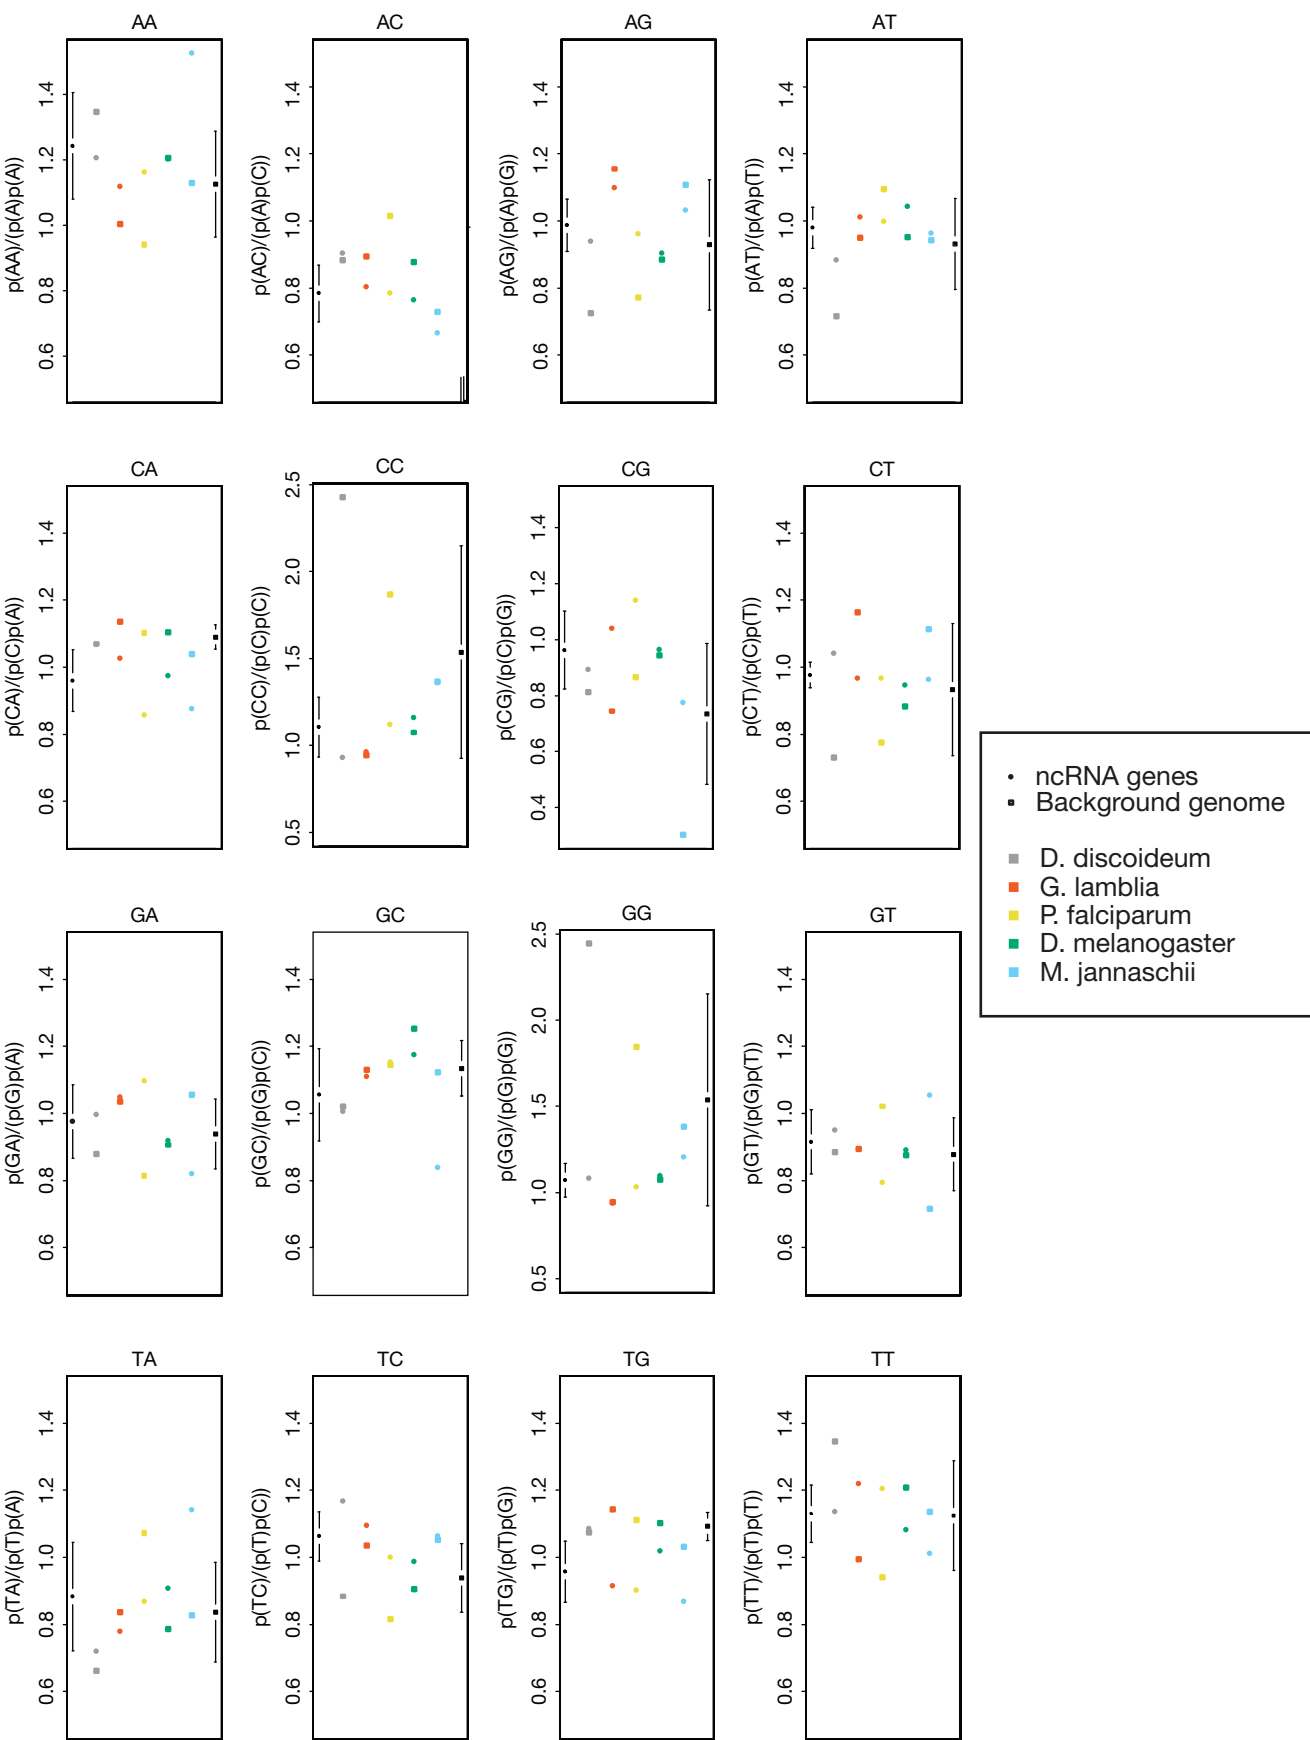

## Supplemental Data S1. Strand asymmetry

Interestingly, mononucleotide composition of the background genome is very nearly strand-symmetric, i.e.  $f(A) = f(T) = 0.43$  and  $f(G) = f(C) = 0.069$  within a strand (Sueoka's Parity Rule 2 (PR2) (Sueoka 1995)) while ncRNA copy strands (the DNA strand that corresponds to the RNA) are about 14% richer than their template strands in G. This suggests that the compositional contrast approach could in principle not only discriminate ncRNA gene-containing regions but also the template from the copy strand. Like mononucleotides, conditional dinucleotides exhibit substantial strand-asymmetry in the target but not the background, again suggesting a potential for strand-detection via contrast methods. However, when searching the genome using scores that were derived in a strand-dependent manner, the predictions of the coding strand did not turn out to be reliable.

Analyses of background and target ncRNA gene data. Perl script for calculating frequencies is available as Supplemental Data S2.

### Observed-expected ratios of the target

|   | A      | C      | G      | T      |
|---|--------|--------|--------|--------|
| A | 1.1588 | 0.7075 | 1.1121 | 0.9881 |
| C | 0.9748 | 1.0545 | 0.9614 | 1.0159 |
| G | 1.0004 | 0.9572 | 1.0296 | 1.0045 |
| T | 0.9170 | 1.2607 | 0.8330 | 1.0273 |

The G-test statistic  $G$  for the target = 542.0854 with 9 degrees of freedom.  
The probability that sites are independent in the target is 0.0000

### Observed-expected ratios of the background

|   | A      | C      | G      | T      |
|---|--------|--------|--------|--------|
| A | 1.3476 | 0.8832 | 0.7252 | 0.7153 |
| C | 1.0695 | 2.4276 | 0.8127 | 0.7312 |
| G | 0.8799 | 1.0208 | 2.4461 | 0.8849 |
| T | 0.6617 | 0.8838 | 1.0733 | 1.3451 |

The G-test statistic  $G$  for the background = 1217561.4755 with 9 degrees of freedom.  
The probability that sites are independent in the target is 0.0000

### Conditional dinucleotide ratios of target over background

|   | A      | C      | G      | T      |
|---|--------|--------|--------|--------|
| A | 0.4646 | 2.5359 | 6.0323 | 0.8858 |
| C | 0.4925 | 1.3752 | 4.6532 | 0.8910 |
| G | 0.6143 | 2.9687 | 1.6556 | 0.7280 |
| T | 0.7488 | 4.5161 | 3.0527 | 0.4898 |

### **Supplemental Data S3. Search for ncRNA genes in *M. jannaschii***

We compared our search method to the works of Klein *et al.* and Schattner (Klein *et al.* 2002; Schattner 2002) by searching for ncRNA genes in the AT-rich genome of *M. jannaschii*. Sequence data and annotations were downloaded from GenBank. We used the set of 43 tRNA and rRNA genes as target set and the genome with these ncRNA genes masked as background for calculating the scores. We subsequently searched the genome with both the M0 and the M1 model. The predictions are presented in Supplemental Fig. S2 where the ranks of the predictions for the different models are plotted against each other. Using both M0 and M1 we detect all of the tRNA and rRNA genes as well as all the five predicted ncRNAs that Klein *et al.* verified experimentally (some predictions overlap more than one gene). At this rank, the SRP RNA and RNase P RNA reported by Schattner along with 14 of his 19 predictions are also detected. All of the Schattner predictions are included along with 19 and 17 extra predictions at rank 64 and 62 for M0 and M1, respectively. It is interesting to note that the two predictions made by Klein *et al.* that overlap ORFs are the ones that score worst with the M1-model. Specifically, out of 207 and 205 predictions for M0 and M1, 59 predictions do not overlap neither annotated ORFs nor known ncRNAs or predictions by Klein *et al.* or Schattner. Of these, the M1 prediction has a lower rank in 46 cases. Hence, we readily reproduce the results of Klein *et al.* and Schattner using our approach.

**Supplemental Table S1.** Genomic coordinates and neighboring non-coding RNA genes of experimentally tested candidates. Strand indications are relative to the official v2.5 *D. discoideum* genome release.

| Name            | M1 prediction |         |         |        | Upstream         |        |          | Downstream       |        |          |
|-----------------|---------------|---------|---------|--------|------------------|--------|----------|------------------|--------|----------|
|                 | Chr           | Start   | End     | Strand | Gene             | Strand | Distance | Gene             | Strand | Distance |
| <i>drd38</i>    | 4             | 2475145 | 2475234 | →      |                  |        |          |                  |        |          |
| <i>drd3</i>     | 1             | 1893172 | 1893369 | →      |                  |        |          |                  |        |          |
| <i>drf115_1</i> | 5             | 693177  | 693295  | →      |                  |        |          | <i>drf115_2</i>  |        | 83       |
| <i>drf115_2</i> | 5             | 693378  | 693520  |        | <i>drf115_1</i>  | →      | 83       |                  |        |          |
| <i>drf17_1</i>  | 1             | 1755846 | 1755987 | ←      |                  |        |          |                  |        |          |
| <i>drf17_2</i>  | 1             | 1756394 | 1756468 | ←      |                  |        |          |                  |        |          |
| <i>drf17_3</i>  | 1             | 4776055 | 4776158 |        |                  |        |          |                  |        |          |
| <i>drf17_4</i>  | 2             | 4773544 | 4773880 |        |                  |        |          |                  |        |          |
| <i>drf17_5</i>  | 5             | 849074  | 849617  | →      |                  |        |          | <i>drf17_6</i>   | ←      | 1        |
| <i>drf17_6</i>  | 5             | 849618  | 849833  | ←      | <i>drf17_5</i>   | →      | 1        | <i>drf17_7</i>   | ←      | 482      |
| <i>drf17_7</i>  | 5             | 850315  | 850389  | ←      | <i>drf17_6</i>   | ←      | 482      |                  |        |          |
| <i>drf17_8</i>  | 5             | 1065031 | 1065390 |        |                  |        |          |                  |        |          |
| <i>drf27_1</i>  | 2             | 87872   | 88021   |        |                  |        |          |                  |        |          |
| <i>drf27_2</i>  | 2             | 93620   | 93707   |        |                  |        |          |                  |        |          |
| <i>drf27_3</i>  | 2             | 291848  | 291997  |        |                  |        |          |                  |        |          |
| <i>drf27_4</i>  | 2             | 328690  | 328825  |        |                  |        |          |                  |        |          |
| <i>drf27_5</i>  | 4             | 3250352 | 3250527 |        |                  |        |          |                  |        |          |
| <i>drf22_1</i>  | 1             | 1651963 | 1652141 | →      |                  |        |          |                  |        |          |
| <i>drf22_2</i>  | 3             | 774812  | 774995  | →      |                  |        |          |                  |        |          |
| <i>drf22_3</i>  | 5             | 2268228 | 2268529 | ←      |                  |        |          |                  |        |          |
| <i>drf22_4</i>  | 5             | 2632109 | 2632192 |        |                  |        |          | <i>drf22_5</i>   |        | 1420     |
| <i>drf22_5</i>  | 5             | 2633612 | 2633696 |        | <i>drf22_4</i>   |        | 1420     |                  |        |          |
| <i>drf22_6</i>  | 6             | 1904491 | 1904786 | ←      |                  |        |          |                  |        |          |
| <i>drf9_1</i>   | 2             | 4428918 | 4429023 |        |                  |        |          |                  |        |          |
| <i>drf9_3</i>   | 2             | 6866495 | 6866879 |        |                  |        |          |                  |        |          |
| <i>drf9_4</i>   | 3             | 1098356 | 1098859 | ←      |                  |        |          | ClassI Predicted | ←      | 1534     |
| <i>drf9_5</i>   | 3             | 1101912 | 1102184 | →      | ClassI Predicted | ←      | 265      |                  |        |          |
| <i>drf9_6</i>   | 4             | 897136  | 897398  | →      |                  |        |          |                  |        |          |
| <i>drf9_7</i>   | 4             | 957509  | 957773  |        | DdR-21           | ←      | 632      | ClassI Predicted | ←      | 471      |
| <i>drf9_8</i>   | 4             | 960593  | 960976  | →      | DdR-22           | ←      | 255      | ClassI Predicted | →      | 616      |
| <i>drf9_9</i>   | 4             | 1662995 | 1663237 | →      | DdR-23C          | ←      | 249      | DdR-24A          | →      | 647      |
| <i>drf9_10</i>  | 4             | 1667271 | 1667538 | →      | DdR-23B          | ←      | 270      | ClassI Predicted | →      | 336      |
| <i>drf9_11</i>  | 4             | 2792499 | 2792766 | →      | ClassI Predicted | ←      | 261      | <i>drf9_12</i>   | ←      | 399      |
| <i>drf9_12</i>  | 4             | 2793165 | 2793326 | →      | <i>drf9_11</i>   | →      | 399      | ClassI Predicted | →      | 203      |
| <i>drf9_13</i>  | 5             | 673919  | 674070  | ←      |                  |        |          |                  |        |          |
| <i>drf15_1</i>  | 1             | 1789139 | 1789262 | →      |                  |        |          |                  |        |          |
| <i>drf15_2</i>  | 1             | 2135534 | 2135640 |        |                  |        |          |                  |        |          |
| <i>drf15_3</i>  | 2             | 89370   | 89506   |        |                  |        |          |                  |        |          |
| <i>drf15_4</i>  | 2             | 95426   | 95562   |        |                  |        |          |                  |        |          |
| <i>drf15_5</i>  | 2             | 326232  | 326368  |        |                  |        |          |                  |        |          |
| <i>drf15_6</i>  | 2             | 6241777 | 6241903 |        |                  |        |          |                  |        |          |
| <i>drf15_7</i>  | 3             | 2833138 | 2833245 |        |                  |        |          |                  |        |          |
| <i>drf15_8</i>  | 5             | 312466  | 312596  |        |                  |        |          |                  |        |          |
| <i>drf32_1</i>  | 1             | 2014925 | 2015070 |        |                  |        |          |                  |        |          |
| <i>drf32_2</i>  | 1             | 2858071 | 2858381 |        |                  |        |          |                  |        |          |
| <i>drf32_3</i>  | 2             | 8182027 | 8182378 |        |                  |        |          |                  |        |          |
| <i>drf32_4</i>  | 6             | 718936  | 719166  |        |                  |        |          |                  |        |          |
| <i>drf11_1</i>  | 2             | 294846  | 294985  |        |                  |        |          |                  |        |          |
| <i>drf11_2</i>  | 2             | 316677  | 317401  |        |                  |        |          |                  |        |          |
| <i>drf11_3</i>  | 2             | 323800  | 323886  |        |                  |        |          |                  |        |          |
| <i>drf11_4</i>  | 3             | 2830876 | 2831587 |        |                  |        |          |                  |        |          |
| <i>drf11_5</i>  | 3             | 2863427 | 2863537 |        |                  |        |          |                  |        |          |
| <i>drf11_6</i>  | 3             | 3665682 | 3665775 |        |                  |        |          |                  |        |          |
| <i>drf11_7</i>  | 3             | 4921473 | 4921646 |        |                  |        |          |                  |        |          |
| <i>drf11_8</i>  | 4             | 4276362 | 4276676 |        |                  |        |          |                  |        |          |
| <i>drf11_9</i>  | 5             | 2611116 | 2611334 |        |                  |        |          |                  |        |          |
| <i>drf11_10</i> | 5             | 3909598 | 3909689 |        |                  |        |          |                  |        |          |
| <i>drf11_11</i> | 5             | 4281170 | 4281589 |        |                  |        |          |                  |        |          |

**Supplemental Table S2.** Oligonucleotides used for Northern blots, 5'RACE, and 3'RACE. Column "RNA": The RNA or group of RNA for which the oligos were used. 1) indicates hybridization signal > 500 nucleotides. 2 and 3 depict oligonucleotides also used for 3' and 5'RACE, respectively. For further details, see Material and Methods.

| Name              | Sequence (5'-3')         | RNA    | Hybridization |
|-------------------|--------------------------|--------|---------------|
| 189               | GGATTTGAAGTCCACACGCATC   | drd38  | +             |
| 206               | GATGCGTGTGGACTTCAAATCC   | drd38  | -             |
| 190               | GAACCAACTGTATGGATTTCTCC  | drf115 | +             |
| 284               | GGAGAAATCCATACAGTTGGTTC  | drf115 | -             |
| 191               | AGTCTCCCACCTATCCTACACAC  | drd3   | +             |
| 285               | GTGTGTAGGATAGGTGGGAGACT  | drd3   | -             |
| 223               | TACCCACCCATCCAACCCCAT    | drf17  | +             |
| 224               | ATGGGGTTGGATGGGTGGGTA    | drf17  | -             |
| 227               | AAATCCGGCTATTCGTCTTACAG  | drf27  | 1) -          |
| 228               | CTGTAAGACGAATAGCCGGATTT  | drf27  | 1) -          |
| 229               | CGACCGACCACTCCTCATTTAC   | drf22  | +             |
| 230               | GTAAATGAGGAGTGGTCGGTCG   | drf22  | -             |
| 193               | TTGTATTCTGGAGTCTGAATAGGT | drf9   | +             |
| 207               | ACCTATTCAGACTCCAGAATACAA | drf9   | -             |
| 231 <sup>2)</sup> | ACCTATTCAGACACCAGAATACAA | drf9   | -             |
| 232 <sup>3)</sup> | TTGTATTCTGGTGTCTGAATAGGT | drf9   | +             |
| 233               | CCCTTCCCATGGACTTCT       | drf15  | +             |
| 234               | AGAAGTCCATGGGAAGGG       | drf15  | -             |
| 235               | GGGAATCTATCCTGGTCAAATA   | drf32  | -             |
| 236               | TATTTGACCAGGATAGATTCCC   | drf32  | -             |
| 239               | TATACCCTGCAAGACATCCATTG  | drf11  | -             |
| 240               | CAATGGATGTCTTGCAGGGTATA  | drf11  | -             |

### Supplemental References

- Klein, R.J., Z. Misulovin, and S.R. Eddy. 2002. Noncoding RNA genes identified in AT-rich hyperthermophiles. *PNAS* **99**: 7542-7547.
- Schattner, P. 2002. Searching for RNA genes using base-composition statistics. *Nucl. Acids Res.* **30**: 2076-2082.
- Sueoka, N. 1995. Intrastrand parity rules of DNA base composition and usage biases of synonymous codons. *J Mol Evol* **40**: 318-325.
